# Supplementary material
Source: PubMed Central journal article supplement (PMC5701882)
Supplement: NIHMS890641-supplement-supplement_1.pdf [file NIHMS890641-supplement-supplement_1.pdf]

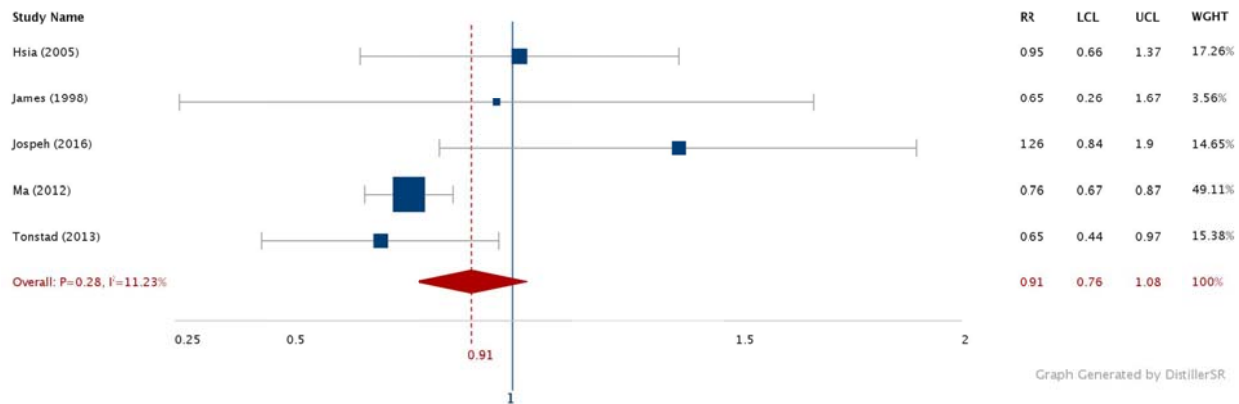

Supplemental figure 1. Funnel plot assessing publication bias within prospective cohort studies examining PA and type 2 diabetes risk.
